# Supplementary material for: Gadolinium-binding helix–turn–helix peptides: DNA-dependent MRI contrast agents
Source: Royal Society of Chemistry journal article supplement (doi:10.1039/b307817e), 2003-01-01

**Gadolinium-binding helix-turn-helix peptides:  
DNA-dependent MRI contrast agents**

Peter Caravan,<sup>†</sup> Jaclyn M. Greenwood,<sup>†</sup> Joel T. Welch,<sup>§</sup> and Sonya J. Franklin<sup>§\*</sup>

**Supplemental Figure S1.** Circular Dichroism spectra of 50  $\mu\text{M}$  apo-P3W (gray line) and GdP3W (3:1, black line) in 50 mM HEPES, pH = 7.4. Estimates of helicity based on  $[\Theta]_{222}$  suggest that apo-P3W is ~18% and GdP3W is ~32% helical under these conditions.

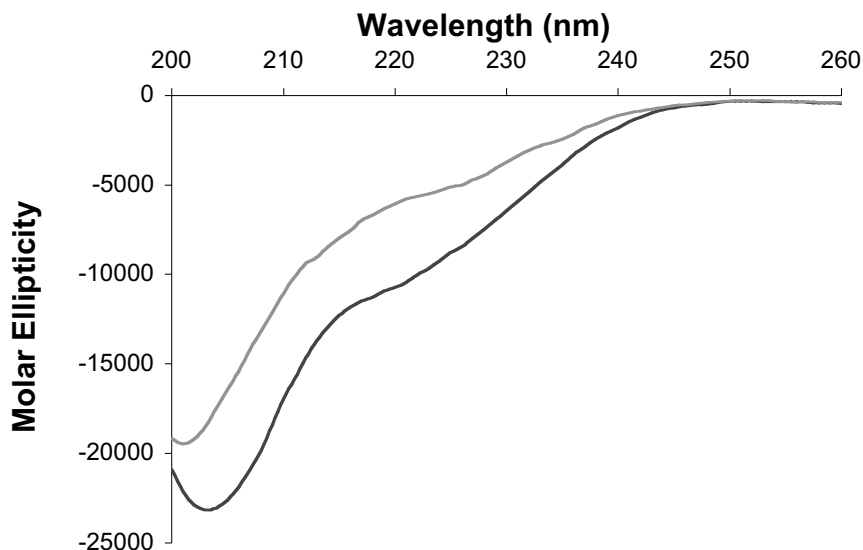

**Supplemental Figure S2.** T1-weighted MR Images at 1.5 tesla of phantoms in HEPES buffer, pH 7.4, ambient temperature. 3D SPGR TR = 40, TE = 3.1,  $\alpha = 75^\circ$ . **Images:** a) HEPES; b) 80  $\mu\text{M}$  P3W; c) 80  $\mu\text{M}$  DNA (14-mer duplex); d) 115  $\mu\text{M}$  GdDTPA; e) 115  $\mu\text{M}$  GdDTPA + DNA (1:1); f) 8.6  $\mu\text{M}$  GdP3W + DNA (1:1); g) 86  $\mu\text{M}$  GdP3W; h) 86  $\mu\text{M}$  GdP3W + DNA (1:1); i) 86  $\mu\text{M}$  GdP3W + DNA (1:1) + NaCl (150 mM).

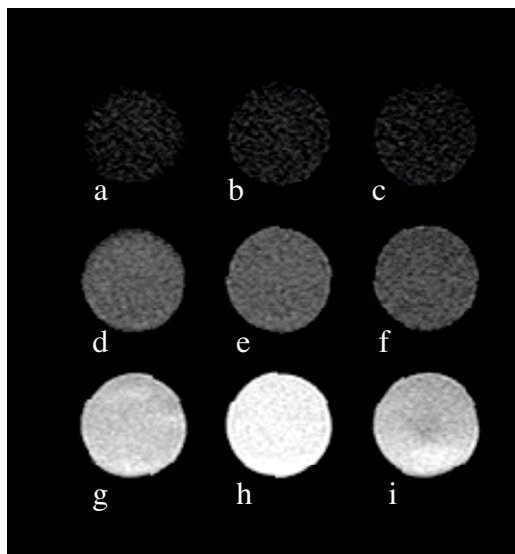

Supplement: b307817e.pdf [file b307817e.pdf]
